# Supplementary material for: Reverse transcriptases can clamp together nucleic acids strands with two complementary bases at their 3′-termini for initiating DNA synthesis
Source: PubMed Central journal article supplement — Nucleic Acids Res. 2010 Sep 27;39(3):1042–53. doi: 10.1093/nar/gkq786 (PMC3035444; doi:10.1093/nar/gkq786), 2010-09-27

## Supplementary Data

### Tables

**Table S1: The synthetic oligonucleotides used in this study.**

| <b>OLIGONUCLEOTIDE DESIGNATION</b> | <b>SEQUENCE</b>                                                    |
|------------------------------------|--------------------------------------------------------------------|
| I1 (21mer)                         | 5'-GTGTGGAAAATCTCTAGCAGT -3'                                       |
| I2 (21mer)                         | 5'-ACTGCTAGAGATTTTCCACAC-3'                                        |
| I3 (19mer)                         | 5'-TGCTAGAGATTTTCCACAC-3'                                          |
| I4 (18mer)                         | 5'-GCTAGAGATTTTCCACAC-3'                                           |
| I5 (17mer)                         | 5'-CTAGAGATTTTCCACAC-3'                                            |
| I6 (16mer)                         | 5'-TAGAGATTTTCCACAC-3'                                             |
| I7 (16mer)                         | 5'-TGCTAGAGATTTTCCA-3'                                             |
| I8 (40mer)                         | 5'-GCCGGCCCATGGTCTTCCTAGAAAATATCCCCTCAGCCAC-3'                     |
| I9 (21mer)                         | 5'-GAGTGAATTAGCCCTTCCAGT-3'                                        |
| I10 (21mer)                        | 5'-TGGAAGGGCTAATTCACAC-3'                                          |
| I11 (20mer)                        | 5'-GTGTGGAAAATCTCTAGCAG-3'                                         |
| I12 (23mer)                        | 5'-GTGTGGAAAATCTCTAGCAGTGG-3'                                      |
| I13 (19mer) (RNA)                  | 5'-UGCUAGAGAUUUUCCACAC-3'                                          |
| I14 (21mer)                        | 5'-TGGTGGAAAATCTCTAGCATG-3'                                        |
| I15 (19mer)                        | 5'-TGCTAGAGATTTTCCACCA-3'                                          |
| I16 (21mer)                        | 5'-GCGTGGAAAATCTCTAGCAGC-3'                                        |
| I17 (19mer)                        | 5'-TGCTAGAGATTTTCCACGC-3'                                          |
| I18 (21mer)                        | 5'-GAGTGGAAAATCTCTAGCAGA-3'                                        |
| I19 (19mer)                        | 5'-TGCTAGAGATTTTCCACTC-3'                                          |
| I20 (21mer)                        | 5'-GGGTGGAAAATCTCTAGCAGG-3'                                        |
| I21 (19mer)                        | 5'-TGCTAGAGATTTTCCACCC-3'                                          |
| I22 (21mer)                        | 5'-CCGTGGAAAATCTCTAGCACC-3'                                        |
| I23 (19mer)                        | 5'-TGCTAGAGATTTTCCACGG-3'                                          |
| I24 (21mer)                        | 5'-CAGTGGAAAATCTCTAGCACA-3'                                        |
| I25 (19mer)                        | 5'-TGCTAGAGATTTTCCACTG-3'                                          |
| I26 (21mer)                        | 5'-CTGTGGAAAATCTCTAGCACT-3'                                        |
| I27 (19mer)                        | 5'-TGCTAGAGATTTTCCACAG-3'                                          |
| I28 (21mer)                        | 5'-TTGTGGAAAATCTCTAGCATT-3'                                        |
| I29 (19mer)                        | 5'-TGCTAGAGATTTTCCACAA-3'                                          |
| I30 (21mer)                        | 5'-ATGTGGAAAATCTCTAGCAAT-3'                                        |
| I31 (19mer)                        | 5'-TGCTAGAGATTTTCCACAT-3'                                          |
| I32 (21mer)                        | 5'-AAGTGGAAAATCTCTAGCAA-3'                                         |
| I33 (19mer)                        | 5'-TGCTAGAGATTTTCCACTT-3'                                          |
| I34 (21mer)                        | 5'-TGAAAGACCCCC GCTGACGGG-3'                                       |
| I35 (54mer)                        | 5'-AATGAAAGACCCCACCTGTAGGTTGGATCCTTACCCGTCAG-<br>-CGGG GGTCTTCA-3' |
| I36 (21mer)                        | 5'-biotin-GTGTGGAAAATCTCTAGCAGT-3'                                 |
| I37 (23mer)                        | 5'-biotin-GTGTGGAAAATCTCTAGCAGTGG-3'                               |
| I38 (25mer)                        | 5'-digoxigenin-TCCTAGAAAATATCCCCTCAGCCAC-3'                        |
| I39 (22mer)                        | 5'-GTGTGGAAAATCTCTAGCAGTG-3'                                       |

**Table S2: Template primers sets used in this study.**

| T/P SET | LABELLED PRIMER | TEMPLATES   | SCHEME                                                            |
|---------|-----------------|-------------|-------------------------------------------------------------------|
| #1      | I1              | I3          | 5' * ——— CAGT 3'<br>3' CA ——— GT $\blacktriangle$ ca ——— gt 5'    |
| #2      | I1              | I3, I8      | 5' * ——— CAGT 3'<br>3' CA ——— GT $\blacktriangle$ ca ——— cg 5'    |
| #3      | I1              | I8          | 5' * ——— CAGT 3'<br>3' $\blacktriangle$ ca ——— cg 5'              |
| #4      | I8              | I1, I3      | 5' ——— CAGT 3'<br>3' CA ——— GT $\blacktriangle$ ca ——— cg *5'     |
| #5      | I1              | I4          | 5' * ——— GCAGT 3'<br>3' CA ——— CG $\blacktriangle$ ca ——— cg 5'   |
| #6      | I1              | I4, I8      | 5' * ——— CAGT 3'<br>3' CA ——— G $\blacktriangle$ ca ——— cg 5'     |
| #7      | I1              | I5          | 5' * ——— AGCAGT 3'<br>3' CA ——— TC $\blacktriangle$ ca ——— tc 5'  |
| #8      | I1              | I6          | 5' * ——— TAGCAGT 3'<br>3' CA ——— AT $\blacktriangle$ ca ——— at 5' |
| #9      | I1              | I5, I8      | 5' * ——— AGCAGT 3'<br>3' CA ——— TC $\blacktriangle$ ca ——— cg 5'  |
| #10     | I11             | I3          | 5' * ——— CAG 3'<br>3' CA ——— GT $\blacktriangle$ ca ——— gt 5'     |
| #11     | I1              | I4, I8      | 5' ——— CAGT 3'<br>3' CA ——— G $\blacktriangle$ ca ——— cg *5'      |
| #12     | I1              | I5, I8      | 5' ——— AGCAGT 3'<br>3' CA ——— TC $\blacktriangle$ ca ——— cg *5'   |
| #13     | I1              | No template | 5' * ——— CAGT 3'                                                  |
| #14     | I1              | I2          | 5' * ——— CAGT 3'<br>3' CA ——— GTCA 5'                             |

|     |     |         |                                                                |
|-----|-----|---------|----------------------------------------------------------------|
| #15 | I9  | I10     | 5' *———CAGT 3'<br>3' CA———GTca———gt 5'                         |
| #16 | I14 | I15     | 5' *———CATG 3'<br>3' AC———GTac———gt 5'                         |
| #17 | I20 | I21     | 5' *———CAGG 3'<br>3' CC———GTcc———gt 5'                         |
| #18 | I16 | I17     | 5' *           CAGC 3'<br>3' CG           GTcg           gt 5' |
| #19 | I18 | I19     | 5' *———CAGA 3'<br>3' CT———GTct———gt 5'                         |
| #20 | I22 | I23     | 5' *———CACC 3'<br>3' GG———GTgg———gt 5'                         |
| #21 | I24 | I25     | 5' *———CACA 3'<br>3' GT———GTgt———gt 5'                         |
| #22 | I26 | I27     | 5' *———CACT3'<br>3' GA———GTga———gt 5'                          |
| #23 | I28 | I29     | 5' *———CATT 3'<br>3' AA———GTaa———gt 5'                         |
| #24 | I30 | I31     | 5' *———CAAT 3'<br>3' TA———GTta———gt 5'                         |
| #25 | I32 | I33     | 5' *———CAAA 3'<br>3' TT———GTtt———gt 5'                         |
| #26 | I39 | I3      | 5' *———CAGTG 3'<br>3' CAC———GTcac———gt 5'                      |
| #27 | I1  | I13     | 5' *———CAGT 3'<br>3' CA———GUca———gu 5'                         |
| #28 | I1  | I13, I8 | 5' *———CAGT 3'<br>3' CA———GUca———cg 5'                         |
| #29 | I36 | I3, I38 | 5' biotin———CAGT 3'<br>3' CA———GTca———ct dig 5'                |
| #30 | I36 | I38     | 5' biotin———CAGT 3'<br>3' ca———ct dig 5'                       |

|     |     |         |                                                |
|-----|-----|---------|------------------------------------------------|
| #31 | I37 | I3, I38 | 5' biotin—CAGTGG 3'<br>3' CA—GT▲cacc—ct dig 5' |
| #32 | I37 | I38     | 5' biotin—CAGTGG 3'<br>3' cacc—ct dig 5'       |
| #33 | I12 | I3, I8  | 5' *—CAGTGG 3'<br>3' CA—GT▲cacc—cg 5'          |
| #34 | I12 | I8      | 5' *—CAGTGG 3'<br>3' ▲cacc—cg 5'               |
| #35 | I34 | I35     | 5' *TG—GG 3'<br>3' AC—AA 5'                    |

The designations of the labeled primers are shown for each set, along with the compatible templates and the relative positioning of the oligonucleotides in each substrate set. The ends of the primers and the first templates are indicated by capital letters and the ends of the functional templates (second templates) are indicated in lower case letters. Nicks or gaps between two adjacent templates (bottom strands) are indicated by arrow heads and an asterisks indicate the [<sup>32</sup>P]5'-ends of the functional primers.

## Legends to Figures

**Fig. S1: The DDDP primer-extension activity of the RTs and DNA-polymerases used in the study.** All reactions were performed in a final volume of 12.5 $\mu$ l and are identical to those described for the clamp/polymerase assay reaction (see “Materials and Methods”), with the exception that in this experiment the T/P used (set #35, see Table S2) is suitable for assaying DDDP rather than the clamp activity. MLV RT was assayed with 5mM MgCl<sub>2</sub> or 0.8mM MnCl<sub>2</sub> while Tfl RT with 5mM MgCl<sub>2</sub> or 0.5 mM MnCl<sub>2</sub>. All other indicated enzymes were assayed with 5mM MgCl<sub>2</sub>.

**Fig. S2: A schematic description of the ELISA-based DNA-binding assay.**

The lengths of the different template primers used are not drawn to scale. The reactions were performed as described in detail in “Materials and Methods”. In each T/P schematic description, the designations of the oligonucleotides are as they appear in Table S1, along with their lengths in nts (in parentheses).

**Fig. S3: Template/primer requirements for an efficient clamp activity.** HIV-1 RT was incubated with the indicated T/Ps and dNTPs for assaying the clamp/polymerase activity, followed by urea-PAGE analysis (see “Materials and Methods”). T/Ps designations and their schemes are indicated, see Fig. 1 for details. For each substrate, lane 1, T/P only; lane 2, T/P+RT; lane 3, T/P+RT+dNTPs.

**Fig. S4: A proposed three-dimensional model for the ability of HIV-1 RT to clamp nucleic acids.** Template primers with 3'-overhangs of only two nucleotides may allow HIV-1 RT to mediate and sustain the binding of a second strand (Template 2). This is followed by DNA synthesis that extends the primer. The 3D structure of HIV-1 RT used in this model (in light yellow), was found in PDB entry 1R0A (Peletskaya et al., *J. Virol* 78: 3387-3397, 2004). Van der Waals surface was added to HIV-1 RT and the original DNA template was "nicked" (by deleting the phosphate atom) between base -2 and -3 relative to the primer 3'-end. Some nucleotides were deleted for simplicity leaving 4 bases of the primer, 3 bases of template 1 and 3 bases of template 2. Residues of HIV-1 RT within 10 Å of the deleted phosphate are displayed in black. Template 1 and template 2 are presented in green and blue, respectively. The DNA primer is presented in red. This model was created using the Accelrys DS Visualizer 1.6 software.

Fig. S1

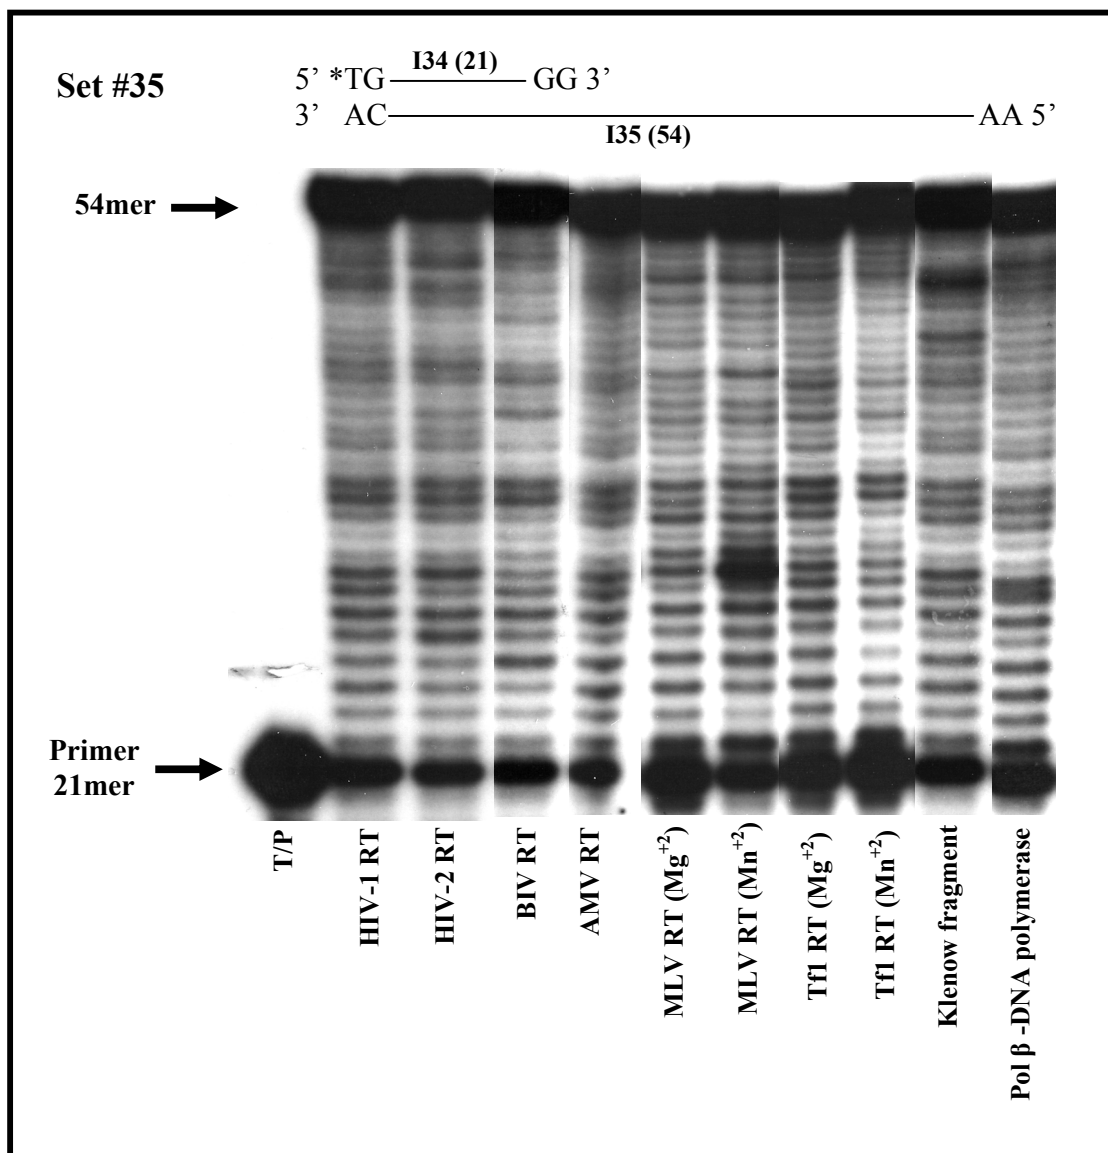

Fig. S2

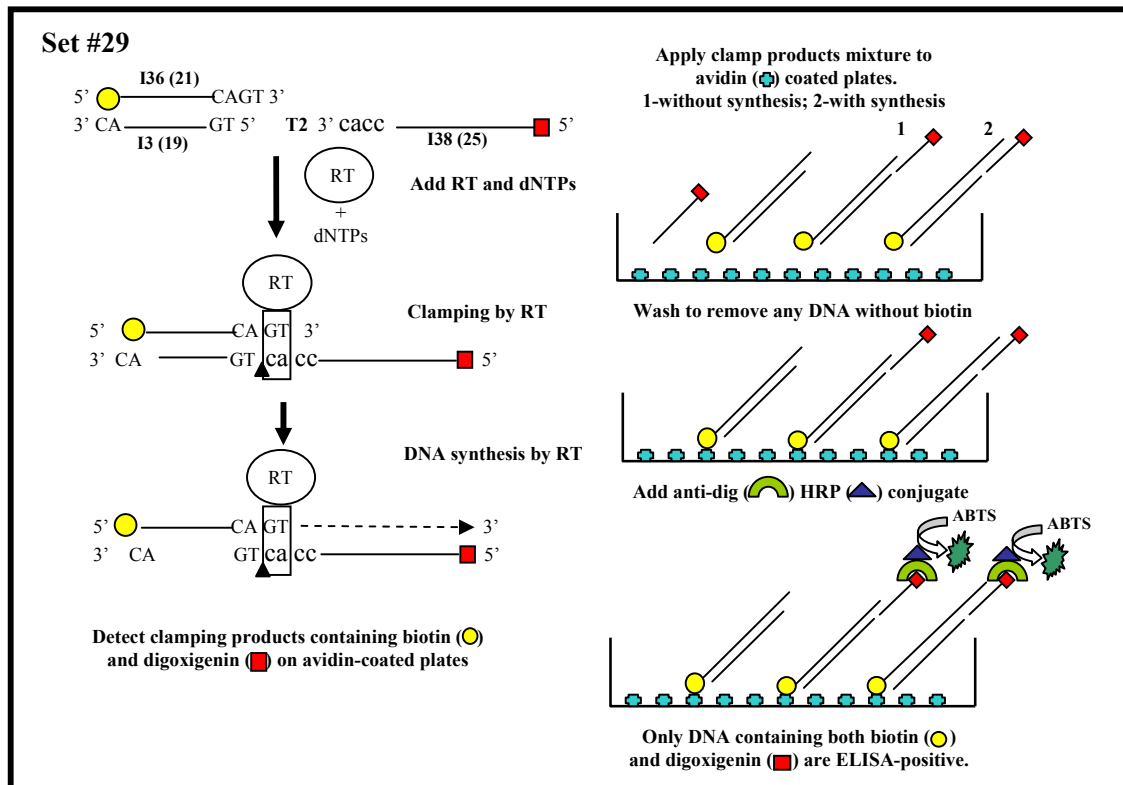

Fig. S3

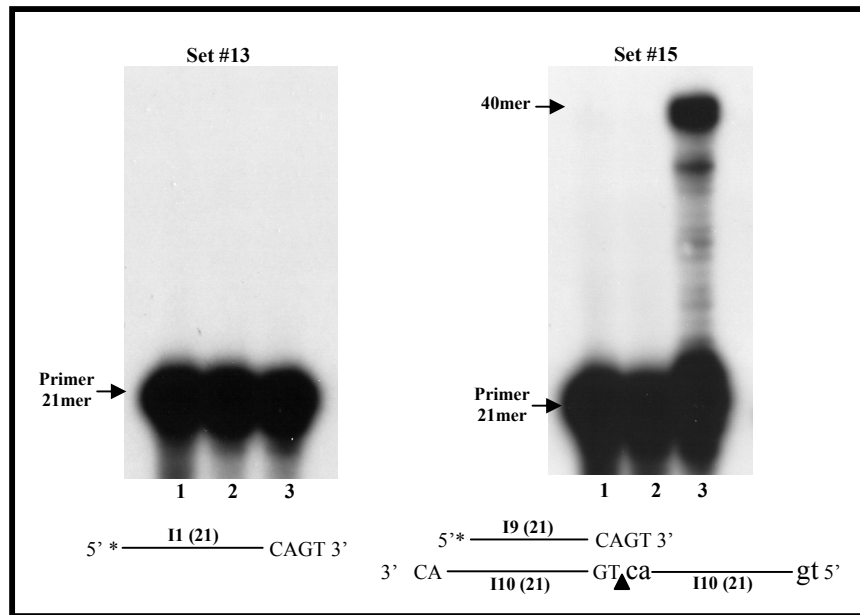



Fig. S4

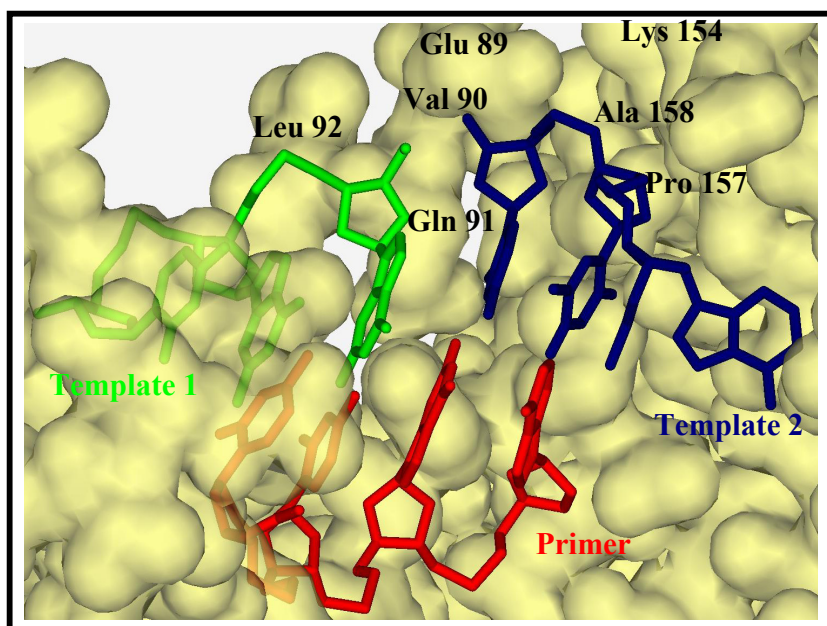

Supplement: supp_gkq786_nar-01316-f-2010-File009.pdf [file supp_gkq786_nar-01316-f-2010-File009.pdf]
